# Supplementary material
Source: publisher figshare collection journal article supplement (https://gsapubs.figshare.com/articles/dataset/_/24128685)
Supplement: Supplementary file 2 [file 1]

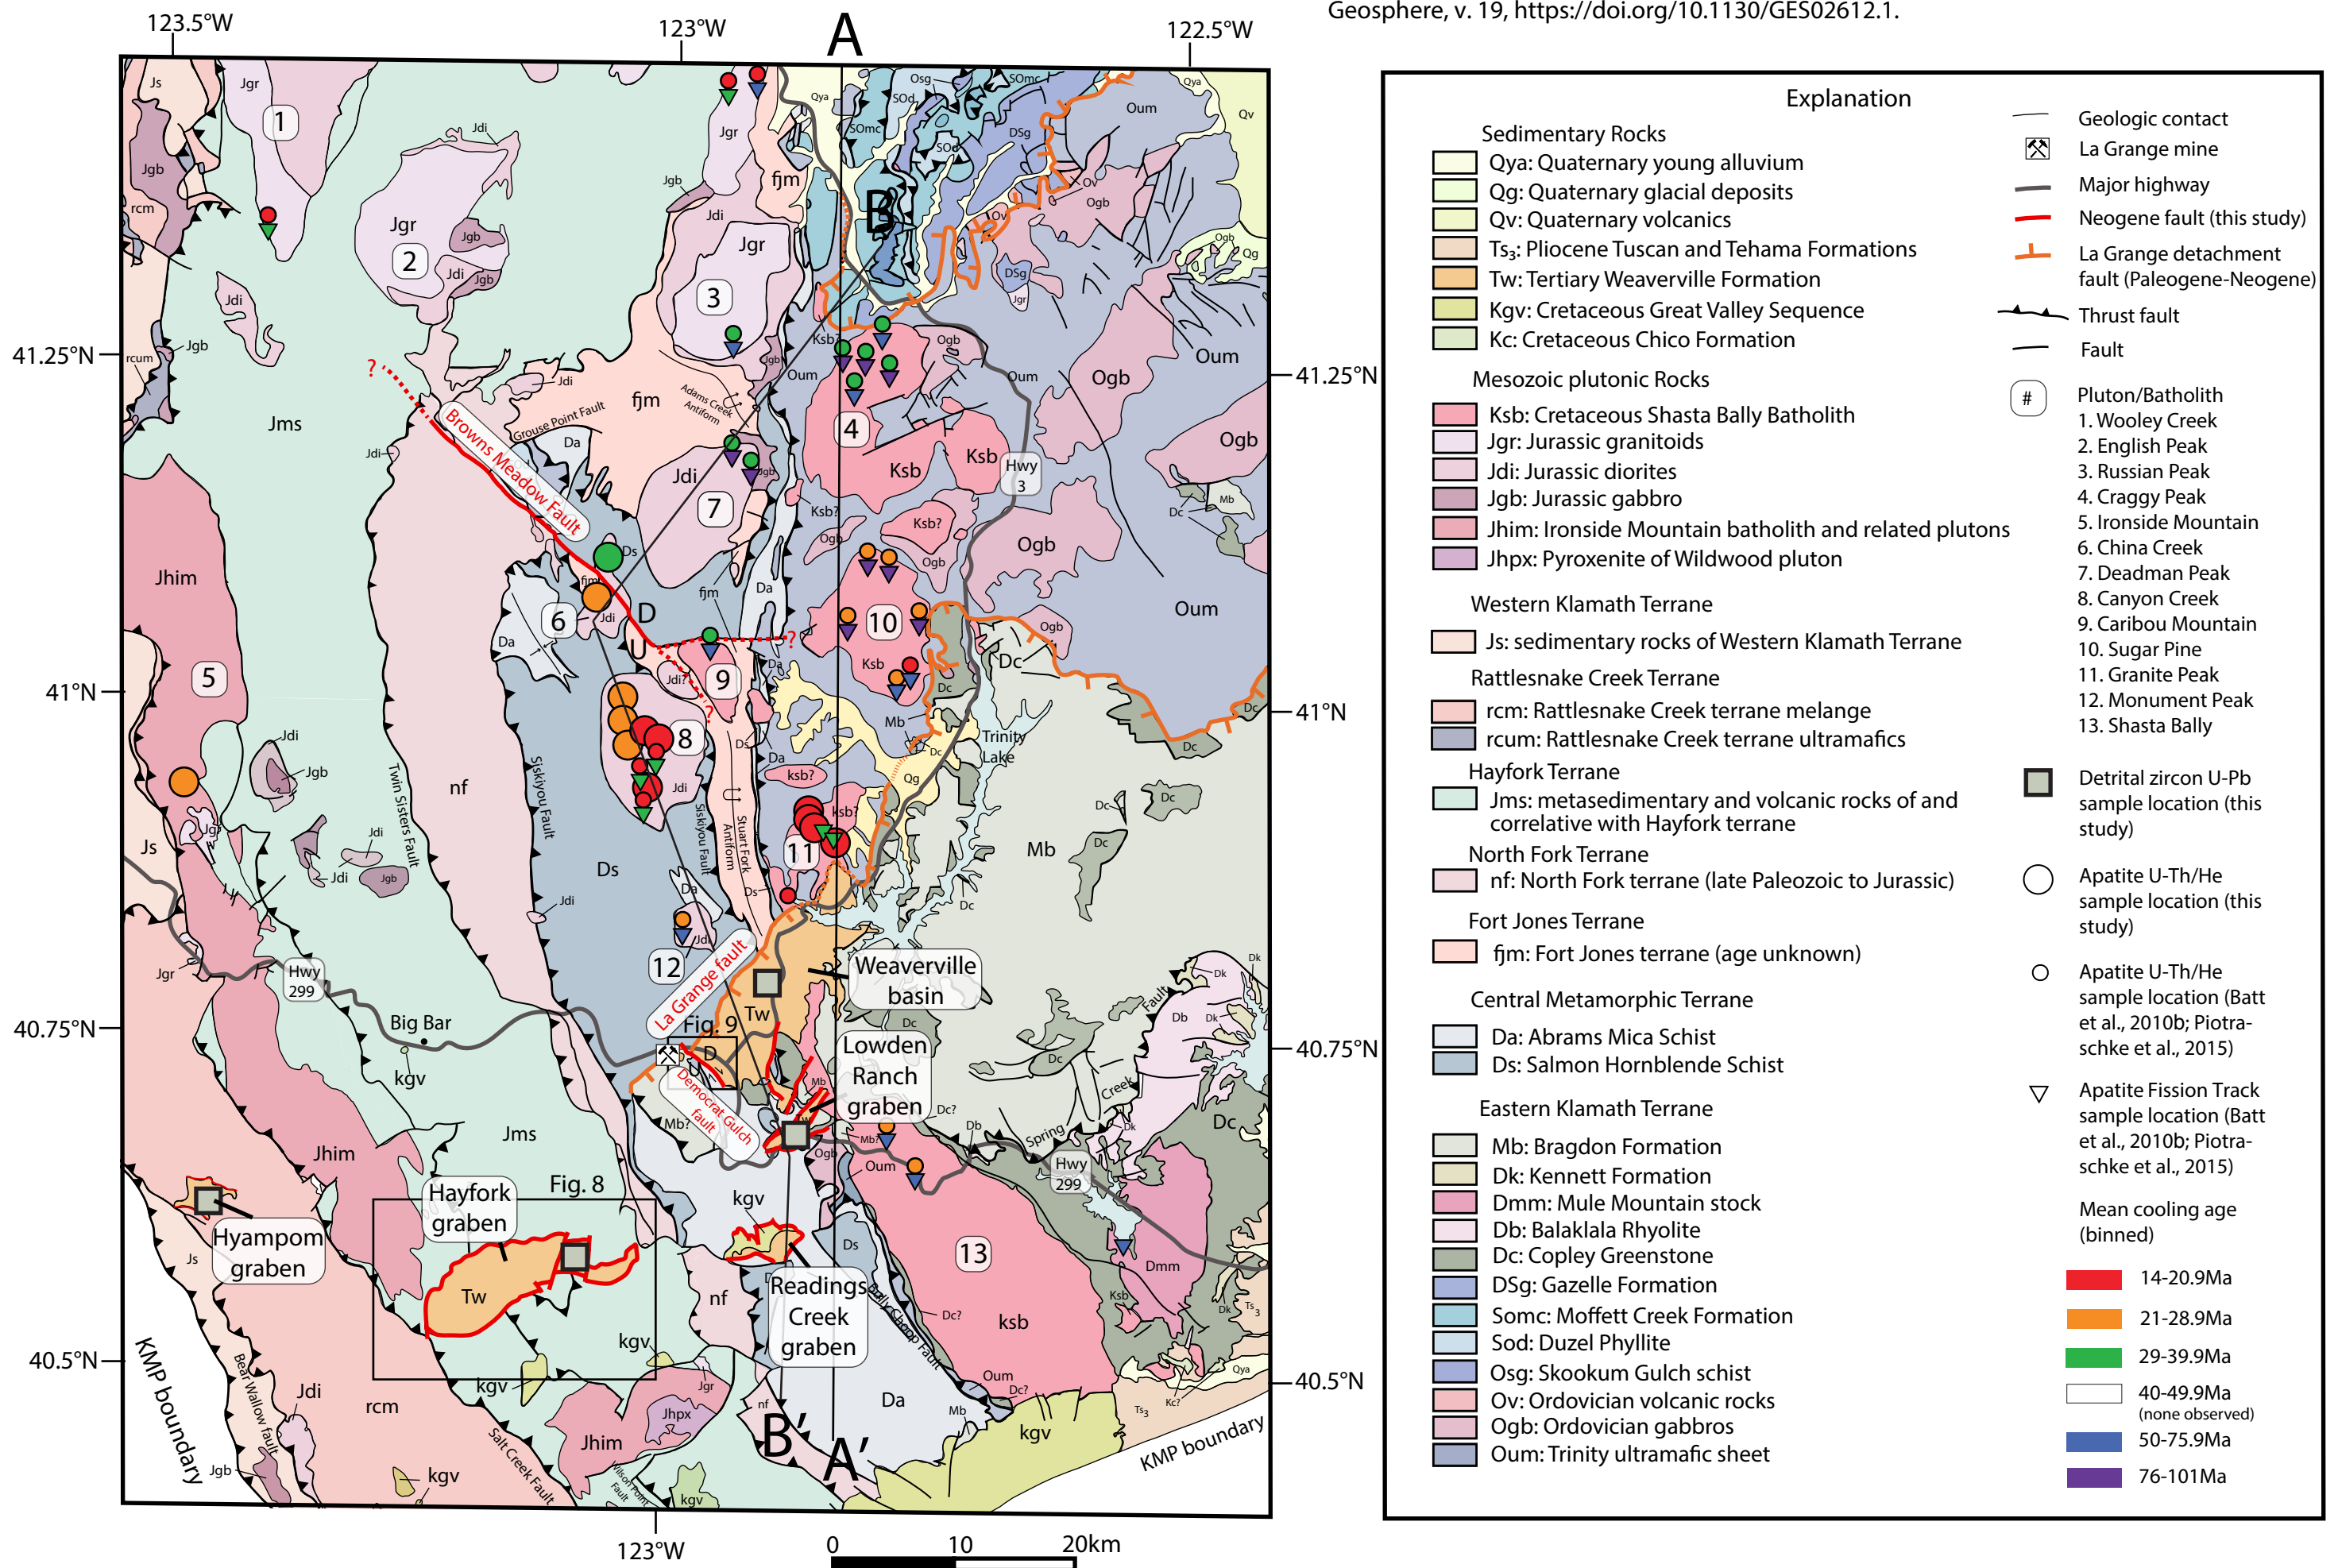

Figure 3. A) Geology B) Isostatic Gravity Map C) Density boundaries D) Aeromagnetic Map with magnetization boundaries
