# Supplementary material
Source: publisher figshare collection journal article supplement (https://gsapubs.figshare.com/articles/dataset/_/24128685)

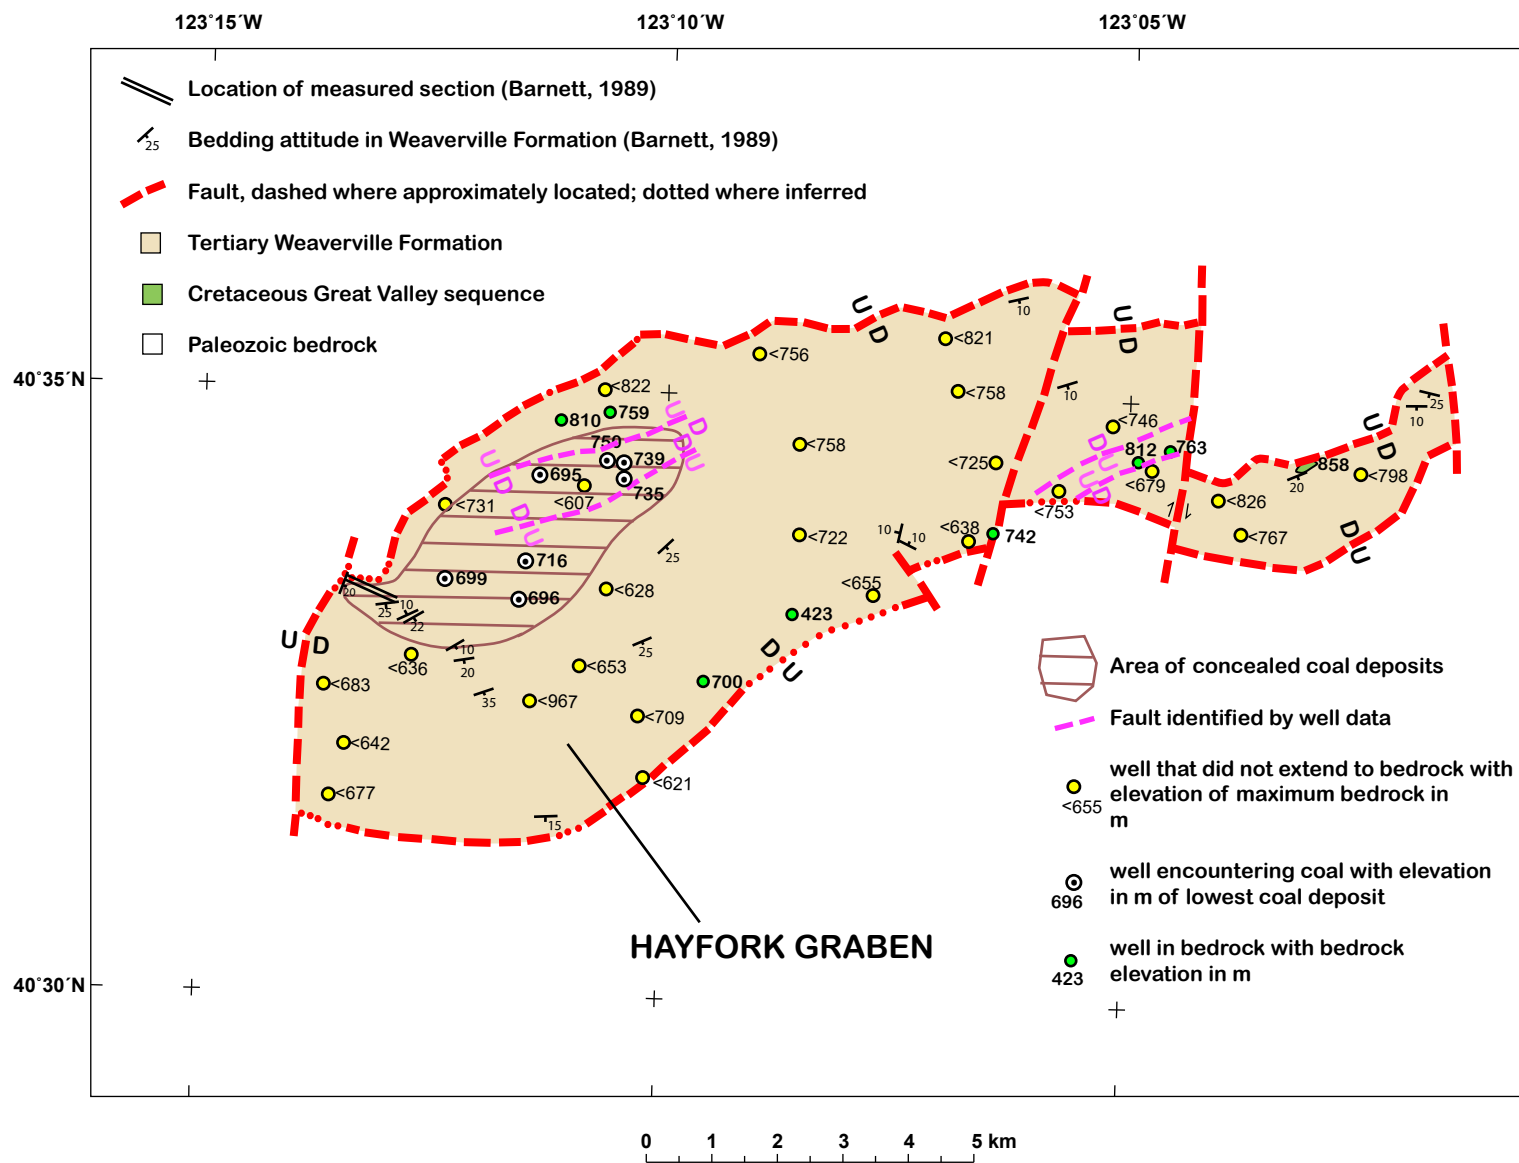

A) Geology

B) Isostatic gravity

C) Basin depth

Supplement: Supplementary file 1 [file 1]
